# Supplementary material for: A Statistical Modeling and Optimization for Cr(VI) Adsorption from Aqueous Media via Teff Straw-Based Activated Carbon: Isotherm, Kinetics, and Thermodynamic Studies
Source: Hindawi journal article supplement (doi:10.1155/2022/7998069), 2022-01-01
Supplement: f1 [file 7998069.f1.docx]

Table S 1. Ranges of process parameters at which adsorption test was conducted

| Examined parameters | Ranges |
| --- | --- |
| Initial concentrations of Cr (VI) mg/L | 50 to 200 with 50 intervals |
| Dosage of adsorbent g | 0.5 to 4 with 0.5 intervals |
| pH | 1 to 7 with 1 interval |
| Contact time (min) | 30 to 150 with 30 intervals |

Table S 2. Analysis of variance and second order polynomial model coefficient of regression for adsorption of Cr (VI) from synthetic solution via TSAC

| Source | Cr (VI) Removal (%) | | | | |
| --- | --- | --- | --- | --- | --- |
| Sum of Square | df | Mean Square | F-value | p-value |
| Model | 1447 | 14 | 105.50 | 65.19 | <0.0001 Significant |
| A | 253.31 | 1 | 253.31 | 156.53 | <0.0001 |
| B | 44.85 | 1 | 44.85 | 27.72 | <0.0001 |
| C | 103.04 | 1 | 103.04 | 63.68 | <0.0001 |
| D | 169.34 | 1 | 169.34 | 104.64 | <0.0001 |
| AB | 19.69 | 1 | 16.69 | 12.17 | 0.0033 |
| AC | 22.87 | 1 | 22.87 | 14.13 | 0.0019 |
| AD | 2.95 | 1 | 2.95 | 1.82 | 0.1970 |
| BC | 0.7014 | 1 | 0.7014 | 0.4334 | 0.5203 |
| BD | 13.30 | 1 | 13.30 | 8.22 | 0.0117 |
| CD | 23.26 | 1 | 23.26 | 14.37 | 0.0018 |
| A2 | 471.09 | 1 | 471.09 | 291.11 | <0.0001 |
| B2 | 308.60 | 1 | 308.60 | 190.70 | <0.0001 |
| C2 | 142.03 | 1 | 142.03 | 87.77 | <0.0001 |
| D2 | 220.34 | 1 | 220.34 | 136.16 | <0.0001 |
| Residual | 24.27 | 15 | 1.62 |  | <0.0001 |
| Lack of fit | 16.47 | 10 | 1.65 | 1.06 | 0.058 Not-Significant |
| Pure error | 7.80 | 5 | 1.56 |  |  |
| Cor total | 1501.28 | 29 |  |  |  |
| Std. Dev | 1.27 |  |  |  |  |
| Mean | 83.95 |  |  |  |  |
| C.V % | 1.52 |  |  |  |  |
| R2 | 0.983 |  |  |  |  |
| Adj. R2 | 0.968 |  |  |  |  |
| Pre. R2 | 0.829 |  |  |  |  |
| Adeq. Precision | 25.65 |  |  |  |  |
| PRESS | 106.10 |  |  |  |  |

where, A is initial Cr (VI) concentration (g/L), B is TSAC dose (g/100 ml), C is pH and D is Contact time (min)
